# Supplementary material for: Effects of Bardoxolone Methyl on Hepatic Enzymes in Patients with Type 2 Diabetes Mellitus and Stage 4 CKD
Source: PubMed Central journal article supplement — Clin Transl Sci. 2020 Sep 3;14(1):299–309. doi: 10.1111/cts.12868 (PMC7877861; doi:10.1111/cts.12868), 2020-09-03
Supplement: CTS-14-299-s001.pdf [file CTS-14-299-s001.pdf]

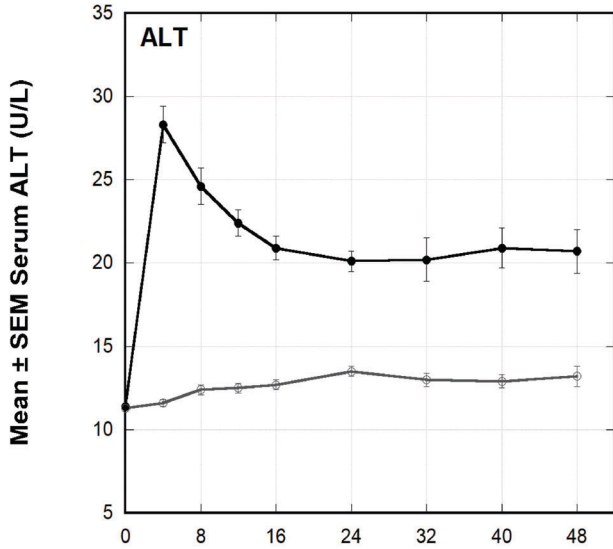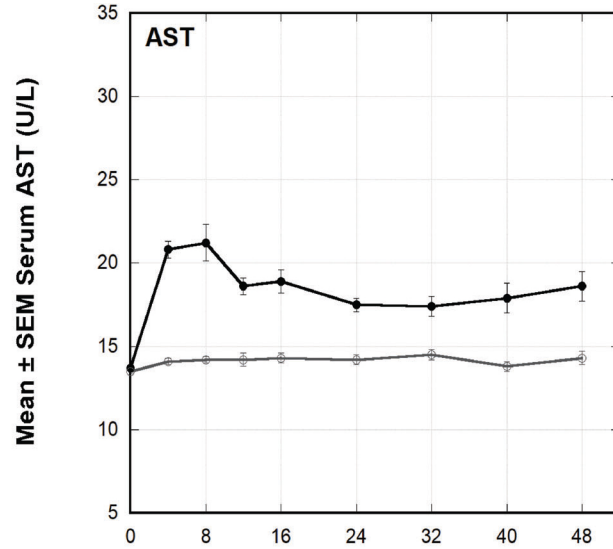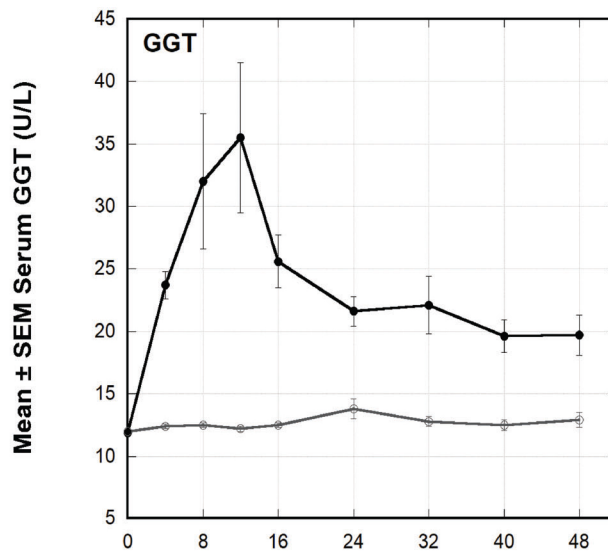

● Bardoxolone Methyl n=261  
○ Placebo n=297

● Bardoxolone Methyl n=260  
○ Placebo n=288

● Bardoxolone Methyl n=170  
○ Placebo n=183

● Bardoxolone Methyl n=264  
○ Placebo n=274

Study Week

● Bardoxolone Methyl n=178  
○ Placebo n=185

● Bardoxolone Methyl n=71  
○ Placebo n=74

**Figure S1. BEACON Patients in the Lowest Quartile of Baseline Hepatic Enzyme Values**  
 Mean [± SEM] ALT, AST, and GGT [U/L] through 48 weeks of treatment for patients in the lowest quartile of baseline values randomized to bardoxolone methyl or placebo. Patients in the lowest quartile had baseline serum concentrations of ALT ≤ 13.6 U/L, AST ≤ 15.8 U/L, and GGT ≤ 15.3 U/L.
