# Supplementary material for: Effects of Bardoxolone Methyl on Hepatic Enzymes in Patients with Type 2 Diabetes Mellitus and Stage 4 CKD
Source: PubMed Central journal article supplement — Clin Transl Sci. 2020 Sep 3;14(1):299–309. doi: 10.1111/cts.12868 (PMC7877861; doi:10.1111/cts.12868), 2020-09-03
Supplement: CTS-14-299-s002.pdf [file CTS-14-299-s002.pdf]

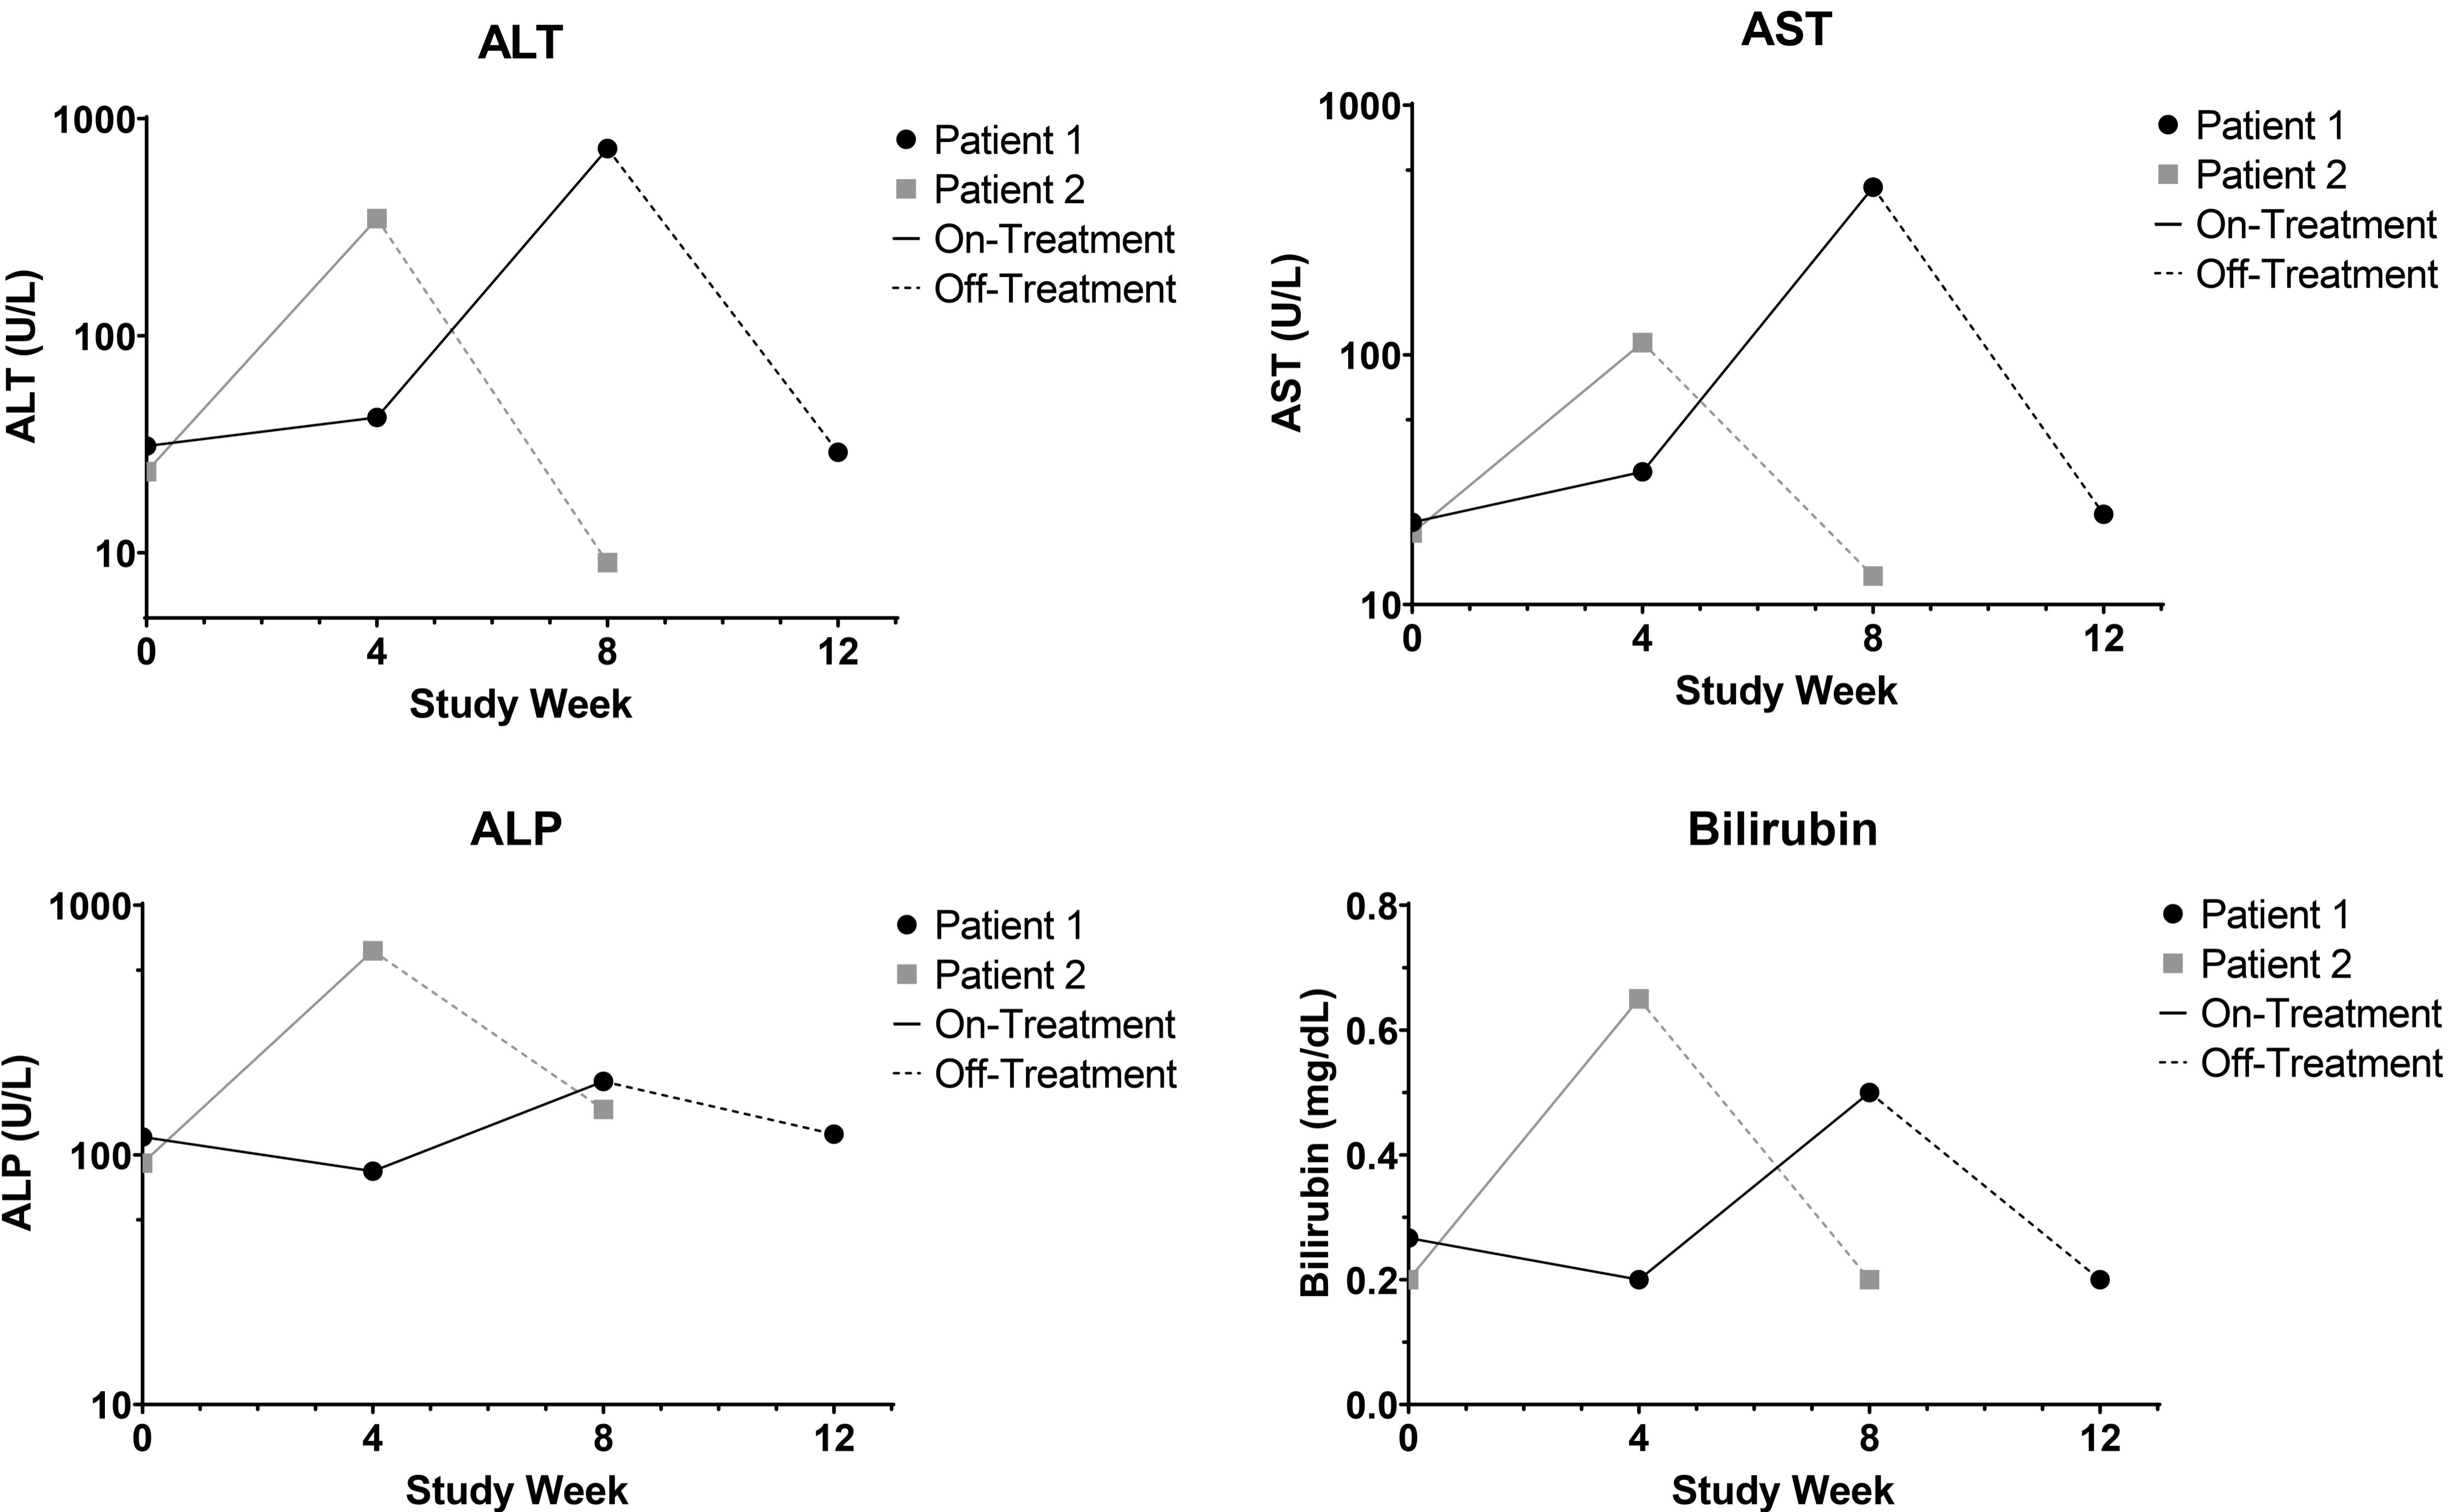

**Figure S2. BEACON Patients with ALT > 10× the Upper Limit of the Population Reference Range**  
 ALT, AST, ALP and total bilirubin concentrations over time for 2 patients randomized to bardoxolone methyl in BEACON that experienced ALT > 10× the upper limit of the population reference range while receiving study drug.
