# Supplementary material for: Effects of Bardoxolone Methyl on Hepatic Enzymes in Patients with Type 2 Diabetes Mellitus and Stage 4 CKD
Source: PubMed Central journal article supplement — Clin Transl Sci. 2020 Sep 3;14(1):299–309. doi: 10.1111/cts.12868 (PMC7877861; doi:10.1111/cts.12868), 2020-09-03
Supplement: CTS-14-299-s003.pdf [file CTS-14-299-s003.pdf]

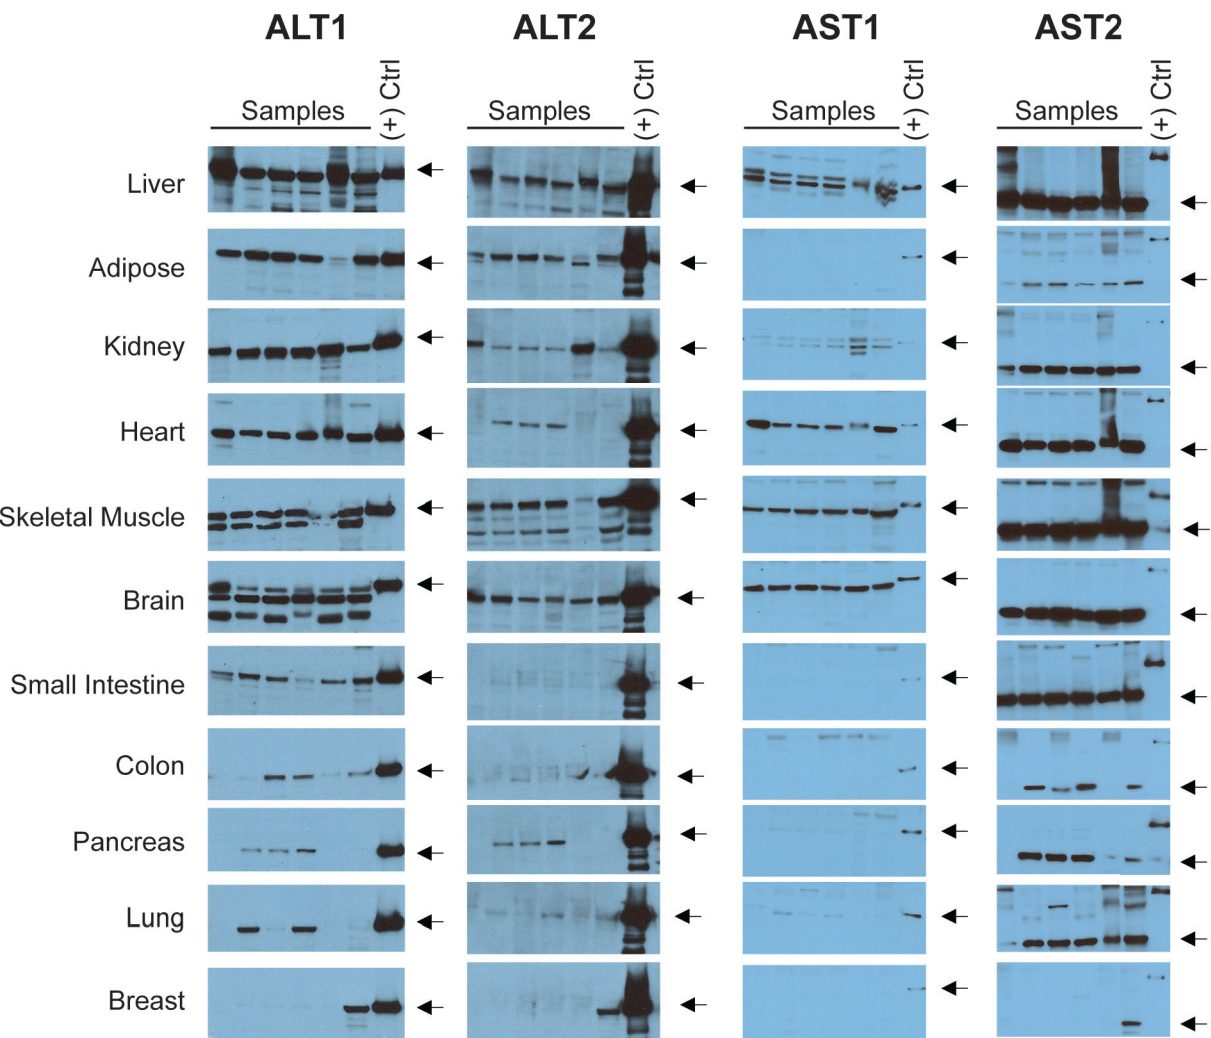

**Figure S3. Aminotransferase Protein Levels in Human Tissue Lysates**

An equivalent amount of tissue lysate, normalized by total protein concentration, was loaded for each sample [N=6 per tissue]. Samples were probed with anti-human-ALT1 -ALT2, -AST1, or -AST2 antibody. Recombinant ALT1, ALT2, AST1, or GST-AST2 fusion protein [MW ~74 kDa] protein was loaded as a positive control. Note that the GST-AST2 fusion protein control migrates at a higher molecular weight than the endogenous AST2 protein.
