# Supplementary material for: Effects of Bardoxolone Methyl on Hepatic Enzymes in Patients with Type 2 Diabetes Mellitus and Stage 4 CKD
Source: PubMed Central journal article supplement — Clin Transl Sci. 2020 Sep 3;14(1):299–309. doi: 10.1111/cts.12868 (PMC7877861; doi:10.1111/cts.12868), 2020-09-03
Supplement: CTS-14-299-s004.pdf [file CTS-14-299-s004.pdf]

## Serum ALT Activity

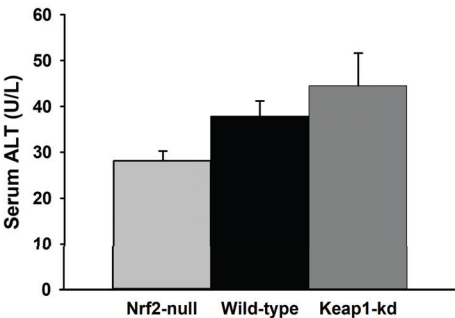

## Hepatic mRNA Expression

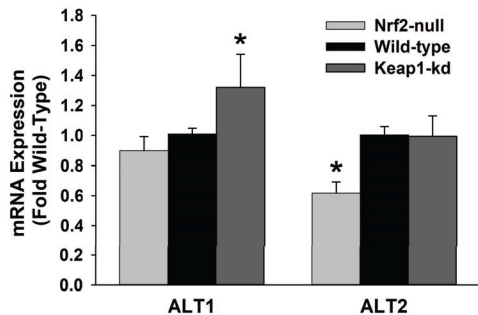

## Renal mRNA Expression

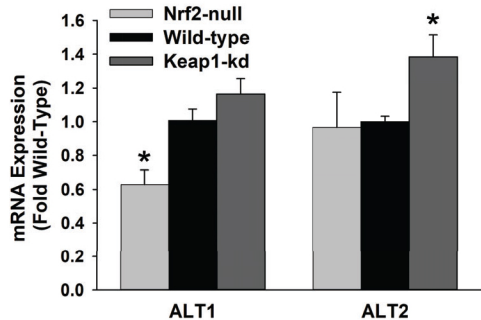

**Figure S4. Serum ALT Activity and ALT mRNA Expression in Wild-type, Nrf2-Null, and Keap1-Knockdown Mice**

Serum was collected from 8-week-old wild-type [n=8], Nrf2-null [n=8], and Keap1-kd [n=9] mice. ALT activity was determined utilizing a commercially available clinical chemistry analyzer. Hepatic mRNA expression of ALT1 and ALT2 were quantified by qRT-PCR in C57Bl/6 wild type [n=7], Nrf2-null [n=7], and Keap1-kd [n=9] mice. Renal mRNA expression of ALT1 and ALT2 were quantified by qRT-PCR in 8-week-old C57Bl/6 wild-type [n=4], Nrf2-null [n=3], and Keap1-kd [n=4] mice. \*indicates a statistically significant difference from wild-type mice [ $p < 0.05$ ].
