# Supplementary material for: Effects of Bardoxolone Methyl on Hepatic Enzymes in Patients with Type 2 Diabetes Mellitus and Stage 4 CKD
Source: PubMed Central journal article supplement — Clin Transl Sci. 2020 Sep 3;14(1):299–309. doi: 10.1111/cts.12868 (PMC7877861; doi:10.1111/cts.12868), 2020-09-03
Supplement: CTS-14-299-s005.pdf [file CTS-14-299-s005.pdf]

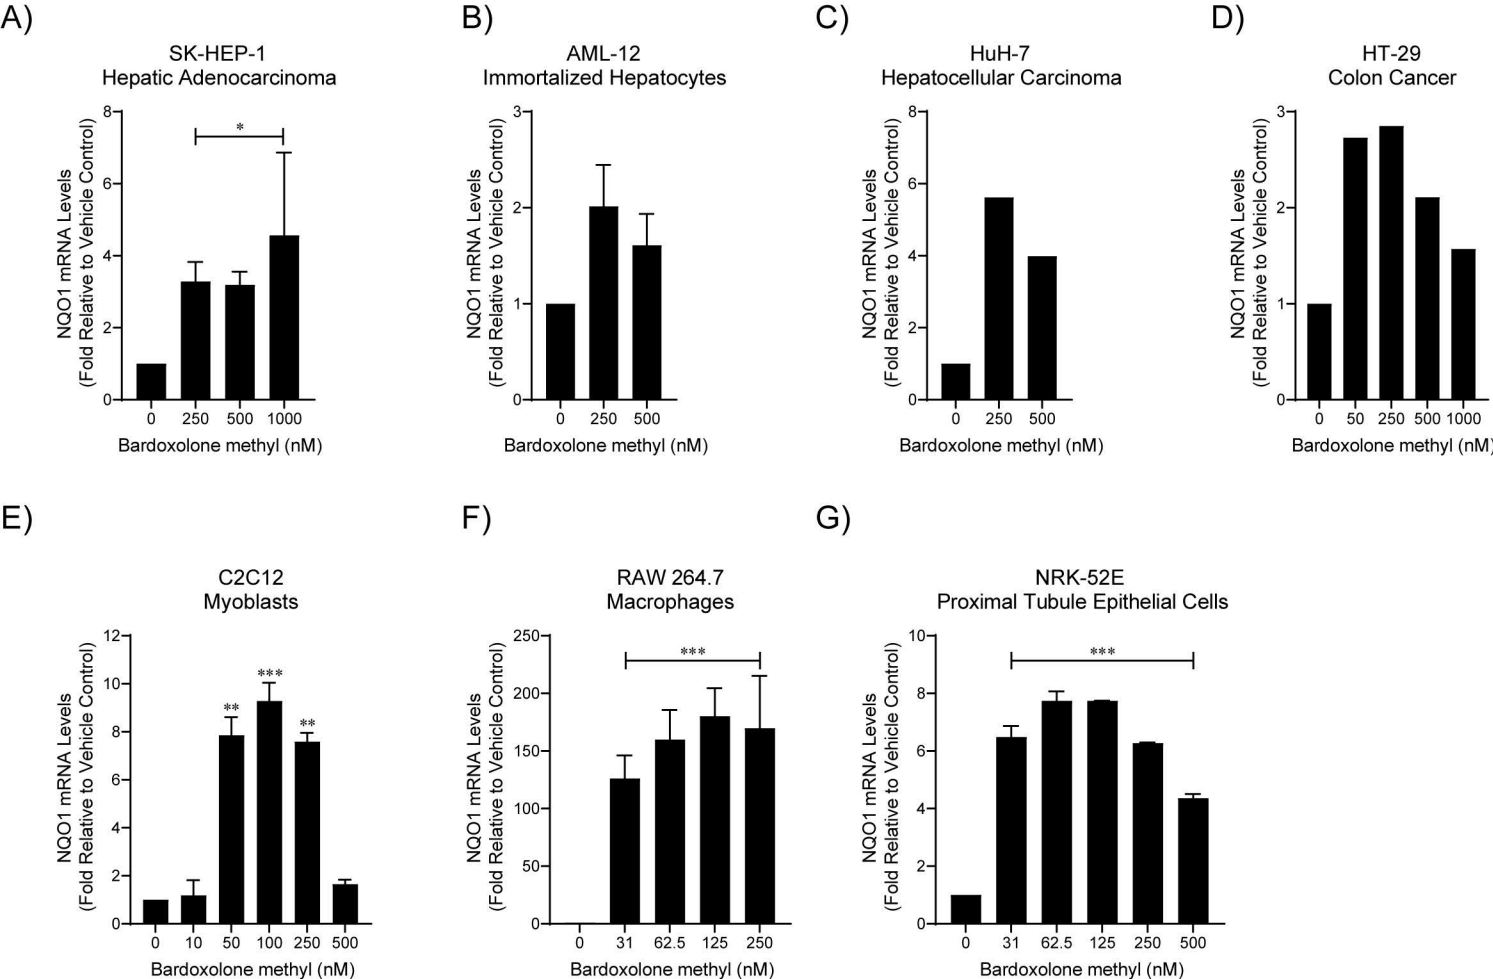

### Figure S5. Bardoxolone Methyl Increases NQO1 Gene Expression

The indicated cell lines were treated with bardoxolone methyl for 16 to 18 hours. NQO1 expression levels were measured by RT-qPCR. Values are expressed as fold-change relative to vehicle [DMSO] treatment and are the average and standard deviation of at least two independent experiments, with the exception of data in HuH-7 and HT-29 cells, which are from single experiments. Statistical significance vs. vehicle control was determined using repeated measures one-way ANOVA and Dunnett's multiple comparison test.

\* $p < 0.05$ ; \*\*  $p < 0.01$ ; \*\*\*  $p < 0.001$ .
